# Supplementary material for: Functional similarity between TGF-beta type 2 and type 1 receptors in the female reproductive tract
Source: PubMed Central journal article supplement (PMC8084965; doi:10.1038/s41598-021-88673-y), 2021-04-29
Supplement: 41598_2021_88673_MOESM1_ESM.pdf [file 41598_2021_88673_MOESM1_ESM.pdf]

## Supplementary Materials

### Functional Similarity between TGF-beta Type 2 and Type 1 Receptors in the Female Reproductive Tract

Nan Ni<sup>1</sup>, Xin Fang<sup>1</sup>, Qinglei Li<sup>1,\*</sup>

<sup>1</sup>Department of Veterinary Integrative Biosciences, Texas A&M University, College Station, TX 77843, USA

**\*Correspondence:** Qinglei Li, Ph.D., Department of Veterinary Integrative Biosciences, College of Veterinary Medicine & Biomedical Sciences, Texas A&M University, College Station, Texas, 77843. Phone: 979 862 2009; Fax: 979 847 8981; E-mail: [qli@cvm.tamu.edu](mailto:qli@cvm.tamu.edu)

#### Table of contents:

Supplementary Figure S1

Supplementary Figure S2

Supplementary Figure S3

Supplementary Figure S4

Supplementary Figure S5

Supplementary Figure S6

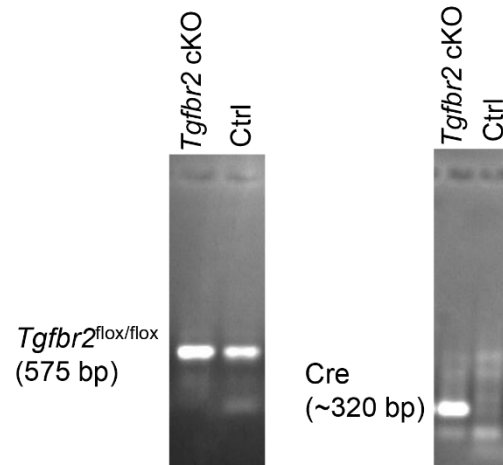

**Figure S1.** Full gel images for Fig. 1b.

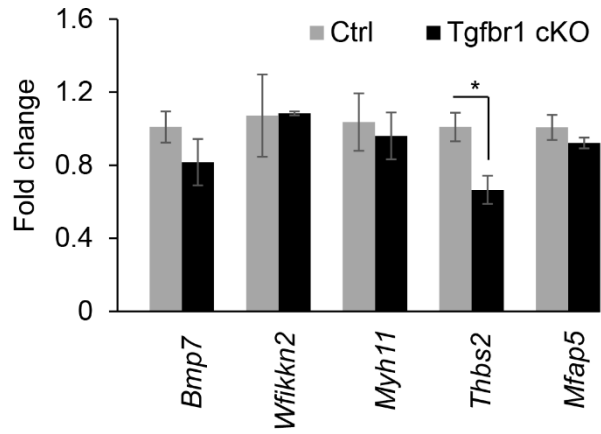

**Figure S2.** Transcript levels of *Bmp7*, *Wfikkn2*, *Myh11*, *Thbs2*, and *Mfap5* in the uteri of controls and *Tgfb1* cKO at PD15.  $n = 4$ . \* $P < 0.05$ .

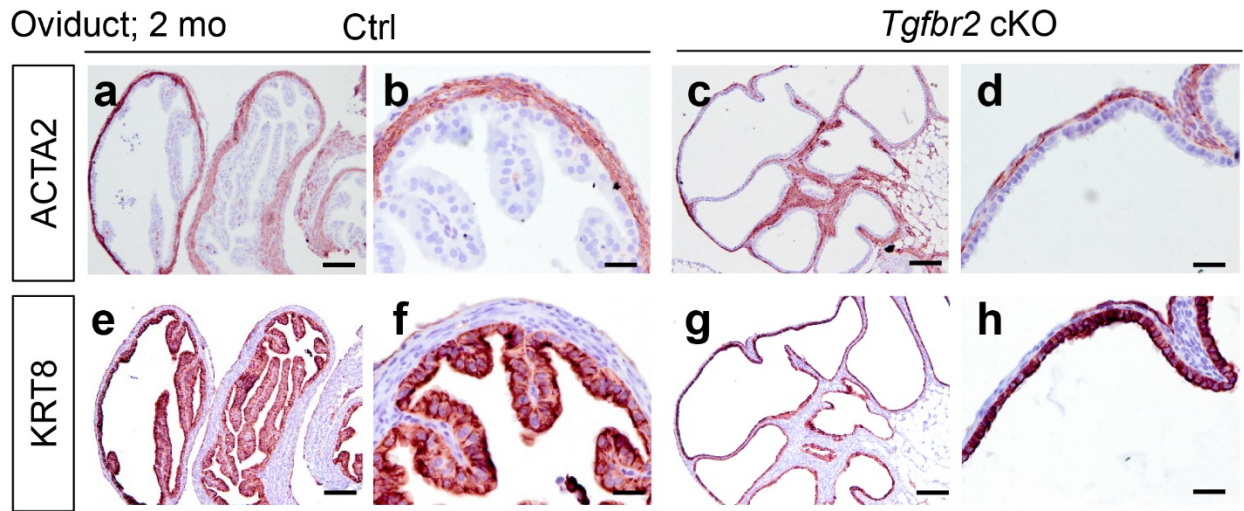

**Figure S3.** Development of oviductal diverticula in *Tgfr2* cKO. (a-h) Immunostaining of ACTA2 and KRT8 using oviducts from controls and *Tgfr2* cKO at 2 months of age.  $n = 3$ . Panels (b, d, f, and h) are higher magnification images for panels (a, c, e, and g). Scale bar equals 25  $\mu\text{m}$  (b, d, f, and h) and 100  $\mu\text{m}$  (a, c, e, and g).

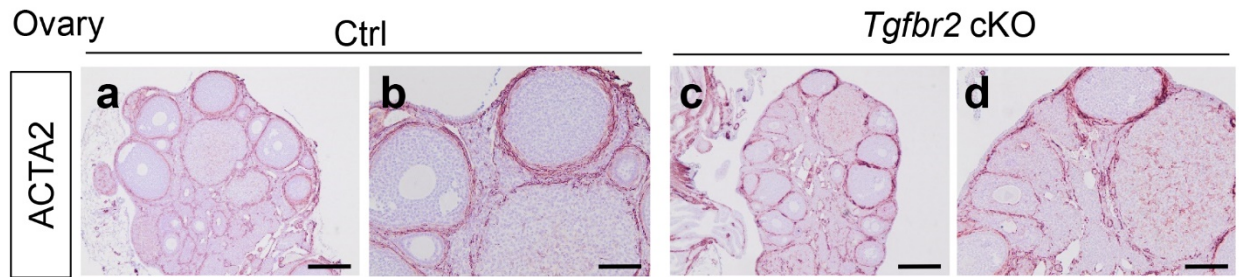

**Figure S4.** Morphological analysis of ovaries from *Tgfbr2* cKO. (a-d) immunostaining of ACTA2 using ovaries from controls and *Tgfbr2* cKO at 3 months of age. Panels (b and d) are higher magnification images for panels (a and c). Scale bar equals 100  $\mu\text{m}$  (b and d) and 250  $\mu\text{m}$  (a and c).

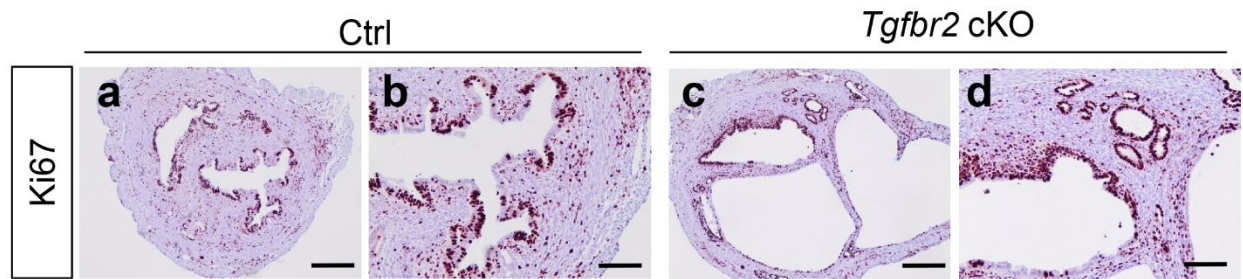

**Figure S5.** Immunostaining of Ki67 using uteri from *Tgfbr2* cKO at 3 months of age. Panels (b and d) are higher magnification images for panels (a and c). Scale bar equals 100 μm (b and d) and 250 μm (a and c).

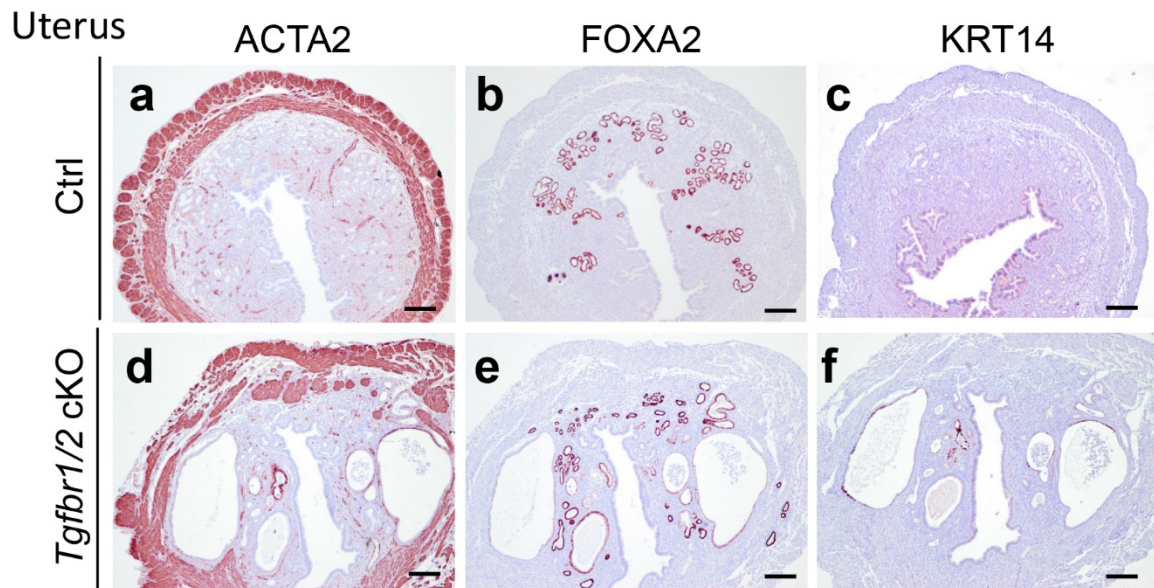

**Figure S6.** Low magnification images for uterine immunostaining of ACTA2, FOXA2, and KRT14 shown in Figure 6. Panels (a-f) represent low magnification images shown in panels (i-n) in Figure 6. Scale bar is representatively shown in (a) and equals 200  $\mu$ m (a-f).
